# Supplementary material for: The economic burden of prostate cancer in Eswatini
Source: Springer Nature journal article supplement (doi:10.1186/s12913-022-07817-6), 2022-04-11
Supplement: MOESM1 [file 20302210]

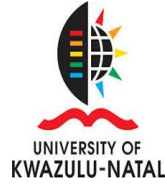

# THE ECONOMIC BURDEN OF CANCER IN THE KINGDOM OF ESWATINI

## Cost of Illness study

### Direct non-medical costs patient questionnaires

---

NHRRB Approval No.:

**Questionnaire No. (Study ID)** [ ][ ][ ][ ]

**Date:** [ ][ ]/[ ][ ]/[ ][ ][ ][ ]  
dd mm yyyy

#### Instructions/Summary

1. This questionnaire is for collecting direct non-medical costs incurred by the patient as a result of seeking health care services following confirmed diagnosis with either of the following cancers: 1). CERVICAL 2). BREAST and 3). PROSTATE. These include cost distance, time and travel related costs.
2. Data from patients with NO CONFIRMED DIAGNOSIS of cervical, breast and prostate cancer MUST NOT be collected

**Part 1:** The following are questions about your background

Please mark or fill in the answer to each question.

| No.                 | Questions                                                                                                                                                                                                                                                                                                                                                                                                                                                                                                                                                                                                                                                                                                                                                                                                                                                                      |                 |                     |                   |                       |                    |                      |                  |                       |                  |                       |                     |                   |                    |                                                   |                    |                       |
|---------------------|--------------------------------------------------------------------------------------------------------------------------------------------------------------------------------------------------------------------------------------------------------------------------------------------------------------------------------------------------------------------------------------------------------------------------------------------------------------------------------------------------------------------------------------------------------------------------------------------------------------------------------------------------------------------------------------------------------------------------------------------------------------------------------------------------------------------------------------------------------------------------------|-----------------|---------------------|-------------------|-----------------------|--------------------|----------------------|------------------|-----------------------|------------------|-----------------------|---------------------|-------------------|--------------------|---------------------------------------------------|--------------------|-----------------------|
| 1.                  | Date of birth <span style="float: right;">\.....\.....\.....<br/>Dd \ mm\ yy</span>                                                                                                                                                                                                                                                                                                                                                                                                                                                                                                                                                                                                                                                                                                                                                                                            |                 |                     |                   |                       |                    |                      |                  |                       |                  |                       |                     |                   |                    |                                                   |                    |                       |
| 2.                  | <b>Marital status</b> <ol style="list-style-type: none"> <li>1. Single (never been married)</li> <li>2. Living with partner (cohabiting)</li> <li>3. Married</li> <li>4. Divorced/separated</li> <li>5. Widow</li> <li>6. Other (please specify):.....</li> </ol>                                                                                                                                                                                                                                                                                                                                                                                                                                                                                                                                                                                                              |                 |                     |                   |                       |                    |                      |                  |                       |                  |                       |                     |                   |                    |                                                   |                    |                       |
| 3.                  | <b>What is your level of education</b> <ol style="list-style-type: none"> <li>1. Never been to school</li> <li>2. Primary</li> <li>3. Secondary/High school</li> <li>4. Tertiary (college/university)</li> </ol>                                                                                                                                                                                                                                                                                                                                                                                                                                                                                                                                                                                                                                                               |                 |                     |                   |                       |                    |                      |                  |                       |                  |                       |                     |                   |                    |                                                   |                    |                       |
| 4.                  | <b>What is your employment status/ main activity (more than one answer is possible)</b> <ol style="list-style-type: none"> <li>1. Gainfully employed</li> <li>2. Self-employed</li> <li>3. Studying</li> <li>4. On sick leave</li> <li>5. retired</li> <li>6. Other (please specify):.....</li> </ol>                                                                                                                                                                                                                                                                                                                                                                                                                                                                                                                                                                          |                 |                     |                   |                       |                    |                      |                  |                       |                  |                       |                     |                   |                    |                                                   |                    |                       |
| 5.                  | <b>How many hours per week are you involved in the above activities (including overtime work)?</b><br>State the time you are (working /studying) in whole hours .....(e.g.: 40hours)<br><br>State the time you are on sick leave in days .....(e.g.: 30 days)                                                                                                                                                                                                                                                                                                                                                                                                                                                                                                                                                                                                                  |                 |                     |                   |                       |                    |                      |                  |                       |                  |                       |                     |                   |                    |                                                   |                    |                       |
| 6.                  | <b>What is your gross annual income? Income refers to salary, pension, student aid, and compensation from insurance fund, income from business or farm over the entire year.</b> <table style="width: 100%; margin-top: 10px;"> <tr> <td style="width: 50%;">1. 1 - 19000SZL</td> <td style="width: 50%;">9. 400 -499 000 SZL</td> </tr> <tr> <td>2. 20 - 39 000SZL</td> <td>10. 500 - 599 000 SZL</td> </tr> <tr> <td>3. 40 - 59 000 SZL</td> <td>11. 600 -699 000 SZL</td> </tr> <tr> <td>4. 60-79 000 SZL</td> <td>12. 700 – 799 000 SZL</td> </tr> <tr> <td>5. 80-99 000 SZL</td> <td>13. 800 – 899 000 SZL</td> </tr> <tr> <td>6. 100- 199 000 SZL</td> <td>14. 900 – 999 000</td> </tr> <tr> <td>7. 200-299 000 SZL</td> <td>15. 1 – 1.9 million SZL15.280-299 thousand kronor</td> </tr> <tr> <td>8. 300-399 000 SZL</td> <td>16. 2 million or more</td> </tr> </table> | 1. 1 - 19000SZL | 9. 400 -499 000 SZL | 2. 20 - 39 000SZL | 10. 500 - 599 000 SZL | 3. 40 - 59 000 SZL | 11. 600 -699 000 SZL | 4. 60-79 000 SZL | 12. 700 – 799 000 SZL | 5. 80-99 000 SZL | 13. 800 – 899 000 SZL | 6. 100- 199 000 SZL | 14. 900 – 999 000 | 7. 200-299 000 SZL | 15. 1 – 1.9 million SZL15.280-299 thousand kronor | 8. 300-399 000 SZL | 16. 2 million or more |
| 1. 1 - 19000SZL     | 9. 400 -499 000 SZL                                                                                                                                                                                                                                                                                                                                                                                                                                                                                                                                                                                                                                                                                                                                                                                                                                                            |                 |                     |                   |                       |                    |                      |                  |                       |                  |                       |                     |                   |                    |                                                   |                    |                       |
| 2. 20 - 39 000SZL   | 10. 500 - 599 000 SZL                                                                                                                                                                                                                                                                                                                                                                                                                                                                                                                                                                                                                                                                                                                                                                                                                                                          |                 |                     |                   |                       |                    |                      |                  |                       |                  |                       |                     |                   |                    |                                                   |                    |                       |
| 3. 40 - 59 000 SZL  | 11. 600 -699 000 SZL                                                                                                                                                                                                                                                                                                                                                                                                                                                                                                                                                                                                                                                                                                                                                                                                                                                           |                 |                     |                   |                       |                    |                      |                  |                       |                  |                       |                     |                   |                    |                                                   |                    |                       |
| 4. 60-79 000 SZL    | 12. 700 – 799 000 SZL                                                                                                                                                                                                                                                                                                                                                                                                                                                                                                                                                                                                                                                                                                                                                                                                                                                          |                 |                     |                   |                       |                    |                      |                  |                       |                  |                       |                     |                   |                    |                                                   |                    |                       |
| 5. 80-99 000 SZL    | 13. 800 – 899 000 SZL                                                                                                                                                                                                                                                                                                                                                                                                                                                                                                                                                                                                                                                                                                                                                                                                                                                          |                 |                     |                   |                       |                    |                      |                  |                       |                  |                       |                     |                   |                    |                                                   |                    |                       |
| 6. 100- 199 000 SZL | 14. 900 – 999 000                                                                                                                                                                                                                                                                                                                                                                                                                                                                                                                                                                                                                                                                                                                                                                                                                                                              |                 |                     |                   |                       |                    |                      |                  |                       |                  |                       |                     |                   |                    |                                                   |                    |                       |
| 7. 200-299 000 SZL  | 15. 1 – 1.9 million SZL15.280-299 thousand kronor                                                                                                                                                                                                                                                                                                                                                                                                                                                                                                                                                                                                                                                                                                                                                                                                                              |                 |                     |                   |                       |                    |                      |                  |                       |                  |                       |                     |                   |                    |                                                   |                    |                       |
| 8. 300-399 000 SZL  | 16. 2 million or more                                                                                                                                                                                                                                                                                                                                                                                                                                                                                                                                                                                                                                                                                                                                                                                                                                                          |                 |                     |                   |                       |                    |                      |                  |                       |                  |                       |                     |                   |                    |                                                   |                    |                       |

**Part 2.** The following are questions about the time and travel related to follow-up care post diagnosis

Please mark or fill in the answer to each question.

| No. | Questions |
|-----|-----------|
|-----|-----------|

|     |                                                                                                                                                                                                                                                                                                                                                                                                           |
|-----|-----------------------------------------------------------------------------------------------------------------------------------------------------------------------------------------------------------------------------------------------------------------------------------------------------------------------------------------------------------------------------------------------------------|
| 1.  | <p><b>Which means of transportation did you use to get here? If more than one, please specify the main one.</b></p> <ol style="list-style-type: none"> <li>1. By foot</li> <li>2. Public transport (bus/kombis)</li> <li>3. Car as a driver</li> <li>4. Car as passenger</li> <li>5. Taxi</li> <li>6. Other (please specify): .....</li> </ol>                                                            |
| 2.  | <p><b>From where did you travel to come to the clinic/hospital/facility for the care following your cancer diagnosis?</b></p> <ol style="list-style-type: none"> <li>1. Your home</li> <li>2. School/Training</li> <li>3. Your workplace</li> <li>4. . Other (please specify):.....</li> </ol>                                                                                                            |
| 3.  | <p><b>Did you do any other errand/business/activity on your way here?</b></p> <p>1. Yes      2. No      (If No skip Q4 to Q5 )</p>                                                                                                                                                                                                                                                                        |
| 4.  | <p><b>What was the errand/business/activity which you did on the way here?</b></p> <ol style="list-style-type: none"> <li>1. Work</li> <li>2. School</li> <li>3. Shopping</li> <li>4. Service (bank, post office, etc.)</li> <li>5. Recreation/leisure activity</li> <li>6. Visit family and/or friends</li> <li>7. Pick up/drop off your child(ren)</li> <li>8. Other private errand/activity</li> </ol> |
| 5.  | <p><b>About how long in minutes did it take you to travel to the clinic? <i>Exclude the time for any other errands</i> .....</b>minutes</p>                                                                                                                                                                                                                                                               |
| 6.  | <p><b>What is the approximate distance in kilometers between the place/location from which you traveled and the clinic? .....</b> kilometers</p>                                                                                                                                                                                                                                                          |
| 7.  | <p><b>Where will you go after your visit to the clinic?</b></p> <ol style="list-style-type: none"> <li>1. Your home</li> <li>2. Your workplace</li> <li>3. School/Training</li> <li>4. Other (please specify).....</li> </ol>                                                                                                                                                                             |
| 8.  | <p><b>Which means of transportation will you take to return to your specified location?</b><br/><i>If more than one, please specify the main one.</i></p> <ol style="list-style-type: none"> <li>1. By foot</li> <li>2. Bicycle</li> <li>3. Car as driver</li> <li>4. Car as a passenger</li> <li>5. Local/regional bus</li> <li>6. Taxi</li> <li>7. Other, (please specify):.....</li> </ol>             |
| 9.  | <p><b>Approximately how long in minutes do you estimate it will take to travel to your destination after the clinic visit? .....</b>minutes</p>                                                                                                                                                                                                                                                           |
| 10. | <p><b>Approximately how far in kilometers do you estimate it is to return to your destination after the clinic visit? .....</b>kilometers</p>                                                                                                                                                                                                                                                             |
| 11. | <p><i>Answer Q11-F211-F213 only if you traveled mainly by car.</i></p> <p><b>About how much do you estimate that you paid to travel here? Include the cost per kilometer by car. SZL .....</b> (Estimate one way costs )</p>                                                                                                                                                                              |
| 12. | <p><b>Did you need to cancel or postpone some activity in order to come to the facility for your care?</b></p> <p>1. Yes      2. No – If no skip Q.13 to Q.14</p>                                                                                                                                                                                                                                         |

|                     |                                                                                                                                                                                                                                                                                                                                                                                                                                                                                                                                                                                                                                                                                                                                                                                                                                                                              |                 |                     |                   |                       |                    |                      |                  |                       |                  |                       |                     |                   |                    |                                                   |                    |                       |
|---------------------|------------------------------------------------------------------------------------------------------------------------------------------------------------------------------------------------------------------------------------------------------------------------------------------------------------------------------------------------------------------------------------------------------------------------------------------------------------------------------------------------------------------------------------------------------------------------------------------------------------------------------------------------------------------------------------------------------------------------------------------------------------------------------------------------------------------------------------------------------------------------------|-----------------|---------------------|-------------------|-----------------------|--------------------|----------------------|------------------|-----------------------|------------------|-----------------------|---------------------|-------------------|--------------------|---------------------------------------------------|--------------------|-----------------------|
| <b>13.</b>          | <b>What was the activity which you needed to cancel or postpone?</b><br>1. Work-related<br>2. Visit family and/or friends<br>3. School-related 7. Pick up/drop off child(ren)<br>4. Shopping 8. Pick up/drop off another person<br>5. Recreation/leisure activity<br>6. Other private errand/activity                                                                                                                                                                                                                                                                                                                                                                                                                                                                                                                                                                        |                 |                     |                   |                       |                    |                      |                  |                       |                  |                       |                     |                   |                    |                                                   |                    |                       |
| <b>14.</b>          | <b>Did you take time off from work to come to the seek care related to your disease?</b><br>1. Yes                            2. No (If no skip <b>Q.15</b> to <b>Q.16</b> )                                                                                                                                                                                                                                                                                                                                                                                                                                                                                                                                                                                                                                                                                                 |                 |                     |                   |                       |                    |                      |                  |                       |                  |                       |                     |                   |                    |                                                   |                    |                       |
| <b>15.</b>          | <b>How many hours did you take off from work? .....hours</b>                                                                                                                                                                                                                                                                                                                                                                                                                                                                                                                                                                                                                                                                                                                                                                                                                 |                 |                     |                   |                       |                    |                      |                  |                       |                  |                       |                     |                   |                    |                                                   |                    |                       |
| <b>16.</b>          | <b>Did you need help from another person to be able to come to the facility for cancer related service (for example, child care or other support)?</b><br>1. Yes                            2. No (If no skip <b>Q.17</b> to <b>Q.18</b> )                                                                                                                                                                                                                                                                                                                                                                                                                                                                                                                                                                                                                                   |                 |                     |                   |                       |                    |                      |                  |                       |                  |                       |                     |                   |                    |                                                   |                    |                       |
| <b>17.</b>          | <b>What is your relationship to that other person?</b><br>1. Partner<br>2. Relative<br>3. Friend<br>4. Child care provider service-Go directly to <b>Q21</b><br>5. Other (please specify).....<br>6. (999) Don't know/Prefer not to answer                                                                                                                                                                                                                                                                                                                                                                                                                                                                                                                                                                                                                                   |                 |                     |                   |                       |                    |                      |                  |                       |                  |                       |                     |                   |                    |                                                   |                    |                       |
| <b>18.</b>          | <b>Did that person have to take time off from work?</b><br>1. Yes    2. No                        999. Don't know                                                                                                                                                                                                                                                                                                                                                                                                                                                                                                                                                                                                                                                                                                                                                            |                 |                     |                   |                       |                    |                      |                  |                       |                  |                       |                     |                   |                    |                                                   |                    |                       |
| <b>19.</b>          | <b>About how many hours do you estimate that this person took off from work?</b><br>.....hours                                                                                                                                                                                                                                                                                                                                                                                                                                                                                                                                                                                                                                                                                                                                                                               |                 |                     |                   |                       |                    |                      |                  |                       |                  |                       |                     |                   |                    |                                                   |                    |                       |
| <b>20.</b>          | <b>What is that person's annual income before taxes?</b> Income refers to salary, pension, student aid, compensation from insurance fund, income from own business or farm.<br><br><table style="width: 100%; border: none;"> <tr> <td style="width: 50%;">1. 1 - 19000SZL</td> <td style="width: 50%;">9. 400 -499 000 SZL</td> </tr> <tr> <td>2. 20 - 39 000SZL</td> <td>10. 500 - 599 000 SZL</td> </tr> <tr> <td>3. 40 - 59 000 SZL</td> <td>11. 600 -699 000 SZL</td> </tr> <tr> <td>4. 60-79 000 SZL</td> <td>12. 700 – 799 000 SZL</td> </tr> <tr> <td>5. 80-99 000 SZL</td> <td>13. 800 – 899 000 SZL</td> </tr> <tr> <td>6. 100- 199 000 SZL</td> <td>14. 900 – 999 000</td> </tr> <tr> <td>7. 200-299 000 SZL</td> <td>15. 1 – 1.9 million SZL15.280-299 thousand kronor</td> </tr> <tr> <td>8. 300-399 000 SZL</td> <td>16. 2 million or more</td> </tr> </table> | 1. 1 - 19000SZL | 9. 400 -499 000 SZL | 2. 20 - 39 000SZL | 10. 500 - 599 000 SZL | 3. 40 - 59 000 SZL | 11. 600 -699 000 SZL | 4. 60-79 000 SZL | 12. 700 – 799 000 SZL | 5. 80-99 000 SZL | 13. 800 – 899 000 SZL | 6. 100- 199 000 SZL | 14. 900 – 999 000 | 7. 200-299 000 SZL | 15. 1 – 1.9 million SZL15.280-299 thousand kronor | 8. 300-399 000 SZL | 16. 2 million or more |
| 1. 1 - 19000SZL     | 9. 400 -499 000 SZL                                                                                                                                                                                                                                                                                                                                                                                                                                                                                                                                                                                                                                                                                                                                                                                                                                                          |                 |                     |                   |                       |                    |                      |                  |                       |                  |                       |                     |                   |                    |                                                   |                    |                       |
| 2. 20 - 39 000SZL   | 10. 500 - 599 000 SZL                                                                                                                                                                                                                                                                                                                                                                                                                                                                                                                                                                                                                                                                                                                                                                                                                                                        |                 |                     |                   |                       |                    |                      |                  |                       |                  |                       |                     |                   |                    |                                                   |                    |                       |
| 3. 40 - 59 000 SZL  | 11. 600 -699 000 SZL                                                                                                                                                                                                                                                                                                                                                                                                                                                                                                                                                                                                                                                                                                                                                                                                                                                         |                 |                     |                   |                       |                    |                      |                  |                       |                  |                       |                     |                   |                    |                                                   |                    |                       |
| 4. 60-79 000 SZL    | 12. 700 – 799 000 SZL                                                                                                                                                                                                                                                                                                                                                                                                                                                                                                                                                                                                                                                                                                                                                                                                                                                        |                 |                     |                   |                       |                    |                      |                  |                       |                  |                       |                     |                   |                    |                                                   |                    |                       |
| 5. 80-99 000 SZL    | 13. 800 – 899 000 SZL                                                                                                                                                                                                                                                                                                                                                                                                                                                                                                                                                                                                                                                                                                                                                                                                                                                        |                 |                     |                   |                       |                    |                      |                  |                       |                  |                       |                     |                   |                    |                                                   |                    |                       |
| 6. 100- 199 000 SZL | 14. 900 – 999 000                                                                                                                                                                                                                                                                                                                                                                                                                                                                                                                                                                                                                                                                                                                                                                                                                                                            |                 |                     |                   |                       |                    |                      |                  |                       |                  |                       |                     |                   |                    |                                                   |                    |                       |
| 7. 200-299 000 SZL  | 15. 1 – 1.9 million SZL15.280-299 thousand kronor                                                                                                                                                                                                                                                                                                                                                                                                                                                                                                                                                                                                                                                                                                                                                                                                                            |                 |                     |                   |                       |                    |                      |                  |                       |                  |                       |                     |                   |                    |                                                   |                    |                       |
| 8. 300-399 000 SZL  | 16. 2 million or more                                                                                                                                                                                                                                                                                                                                                                                                                                                                                                                                                                                                                                                                                                                                                                                                                                                        |                 |                     |                   |                       |                    |                      |                  |                       |                  |                       |                     |                   |                    |                                                   |                    |                       |
| <b>21.</b>          | <b>For approximately how many hours did you need childcare? .....hours</b>                                                                                                                                                                                                                                                                                                                                                                                                                                                                                                                                                                                                                                                                                                                                                                                                   |                 |                     |                   |                       |                    |                      |                  |                       |                  |                       |                     |                   |                    |                                                   |                    |                       |
| <b>22.</b>          | <b>Approximately how much do you pay per hour for childcare service?</b><br>.....SZL per hour                                                                                                                                                                                                                                                                                                                                                                                                                                                                                                                                                                                                                                                                                                                                                                                |                 |                     |                   |                       |                    |                      |                  |                       |                  |                       |                     |                   |                    |                                                   |                    |                       |
| <b> </b>            |                                                                                                                                                                                                                                                                                                                                                                                                                                                                                                                                                                                                                                                                                                                                                                                                                                                                              |                 |                     |                   |                       |                    |                      |                  |                       |                  |                       |                     |                   |                    |                                                   |                    |                       |

**Name of data collector:** .....  
**Date:** .....  
**Signature:**.....

**Participant's signature:.....**

**Date:.....**
